# Supplementary material for: 4-Methylenesterols from a Sponge Theonella swinhoei
Source: PubMed Central journal article supplement (PMC3407929; doi:10.3390/md10071536), 2012-07-19
Supplement: marinedrugs-10-01536-s001.pdf [file marinedrugs-10-01536-s001.pdf]

# Supporting Information

## 4-Methylenesterols from a Sponge *Theonella swinhoei*

### Table of Contents

- S1. Table of Contents
- S2.  $^1\text{H}$  NMR spectrum of **1** in  $\text{CDCl}_3$  at 500 MHz.
- S3.  $^{13}\text{C}$  NMR spectrum of **1** in  $\text{CDCl}_3$  at 125 MHz.
- S4.  $^1\text{H}$  NMR spectrum of **2** in  $\text{CDCl}_3$  at 500 MHz.
- S5.  $^{13}\text{C}$  NMR spectrum of **2** in  $\text{CDCl}_3$  at 125 MHz.
- S6.  $^1\text{H}$  NMR spectrum of **3** in  $\text{CDCl}_3$  at 500 MHz.
- S7.  $^{13}\text{C}$  NMR spectrum of **3** in  $\text{CDCl}_3$  at 125 MHz.
- S8.  $^1\text{H}$  NMR spectrum of **4** in  $\text{CDCl}_3$  at 400 MHz.
- S9.  $^{13}\text{C}$  NMR spectrum of **4** in  $\text{CDCl}_3$  at 100 MHz.
- S10.  $^1\text{H}$  NMR spectrum of **5** in  $\text{CDCl}_3$  at 400 MHz.
- S11.  $^{13}\text{C}$  NMR spectrum of **5** in  $\text{CDCl}_3$  at 100 MHz.

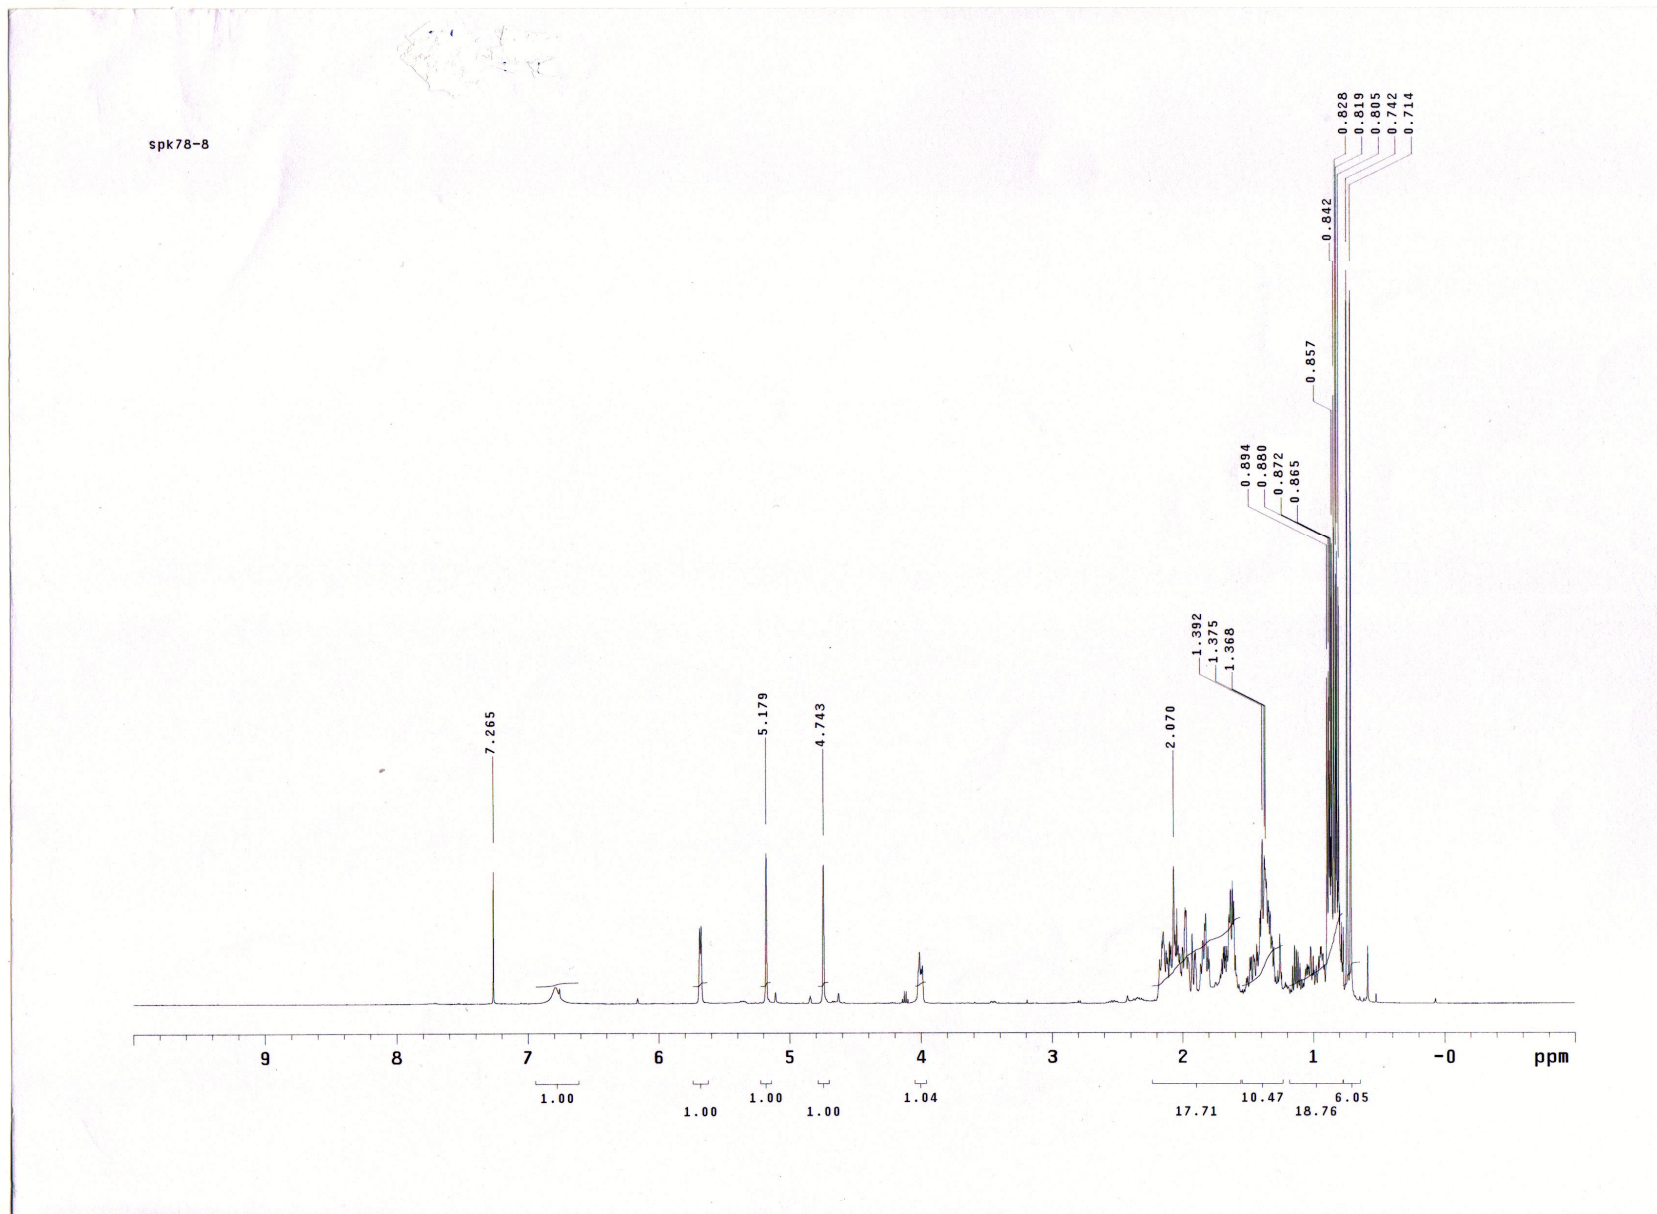

S2.  $^1\text{H}$  NMR spectrum of **1** in  $\text{CDCl}_3$  at 500 MHz.

spk78-8

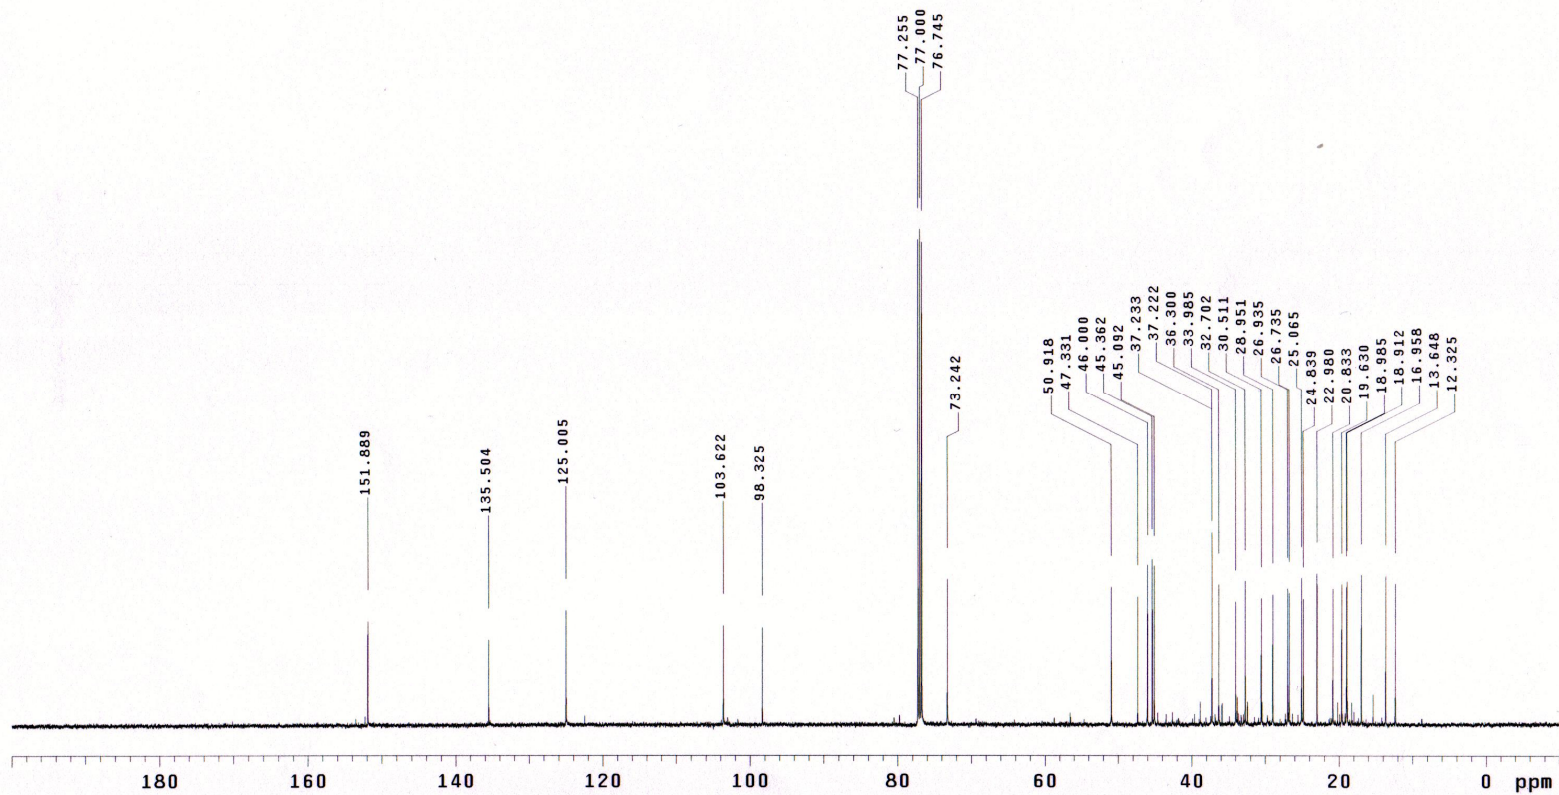

S3.  $^{13}\text{C}$  NMR spectrum of **1** in  $\text{CDCl}_3$  at 125 MHz.



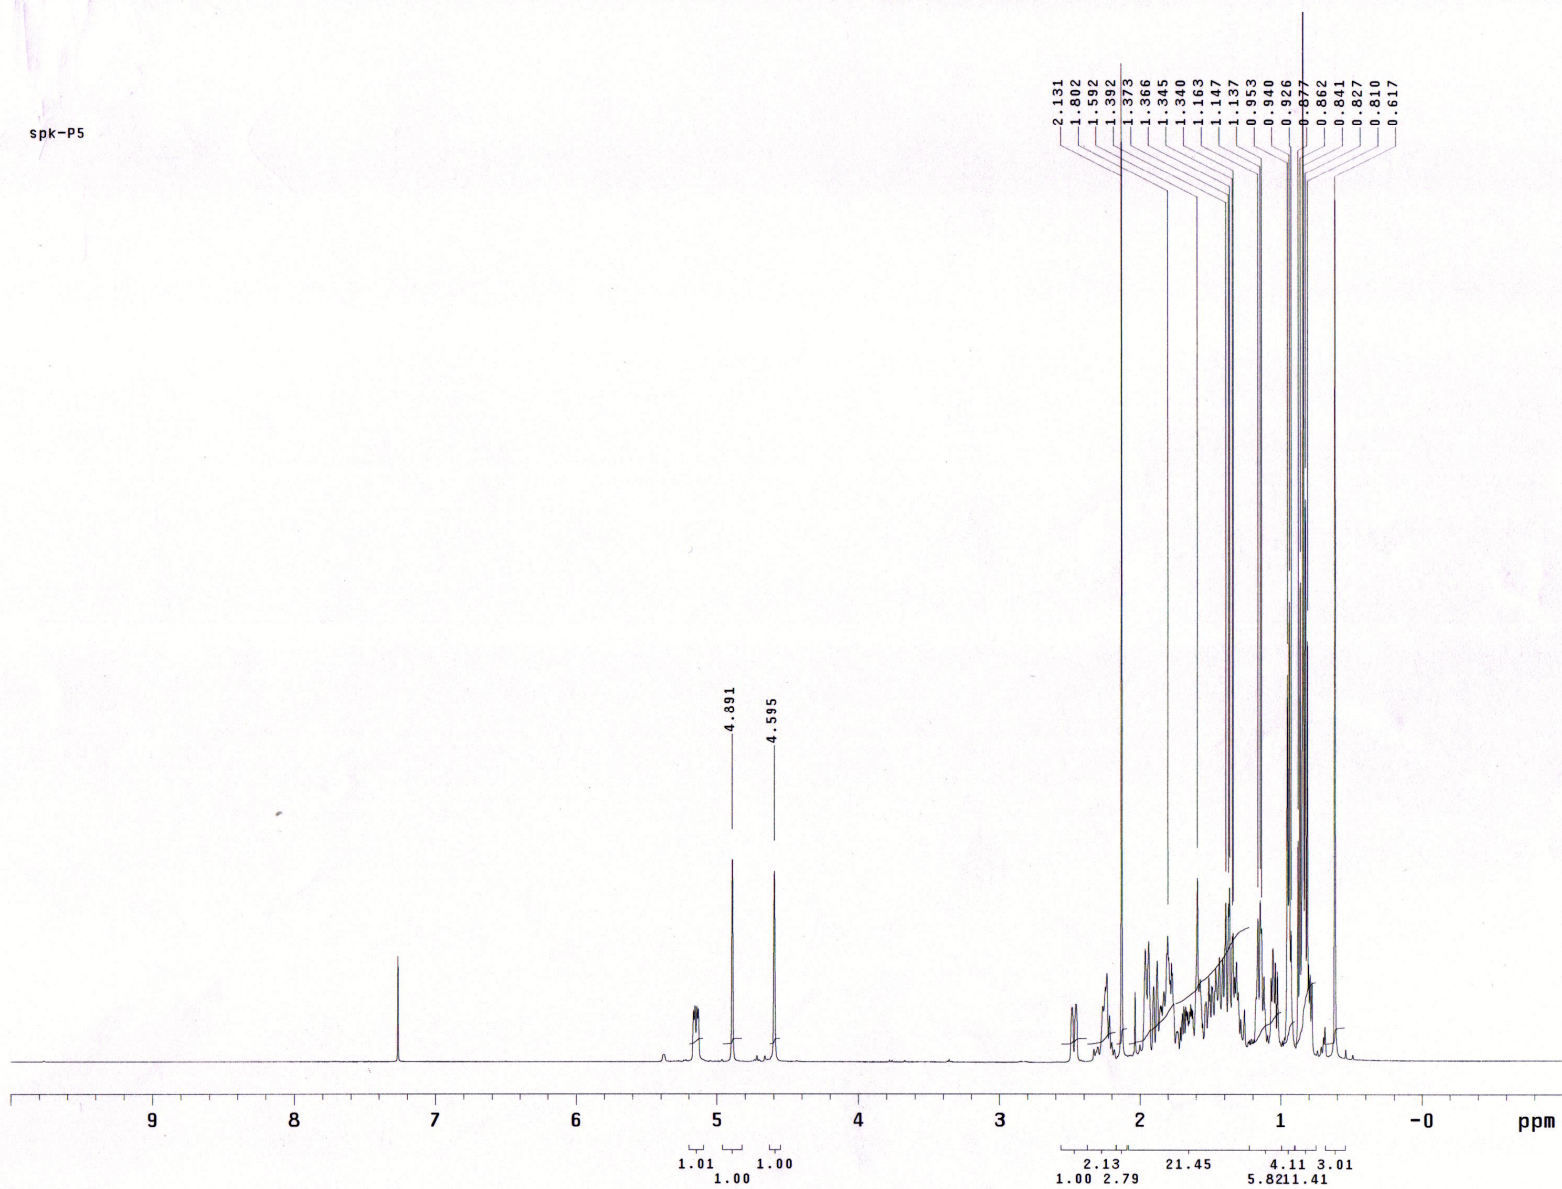

S4.  $^1\text{H}$  NMR spectrum of **2** in  $\text{CDCl}_3$  at 500 MHz.

spk-P5

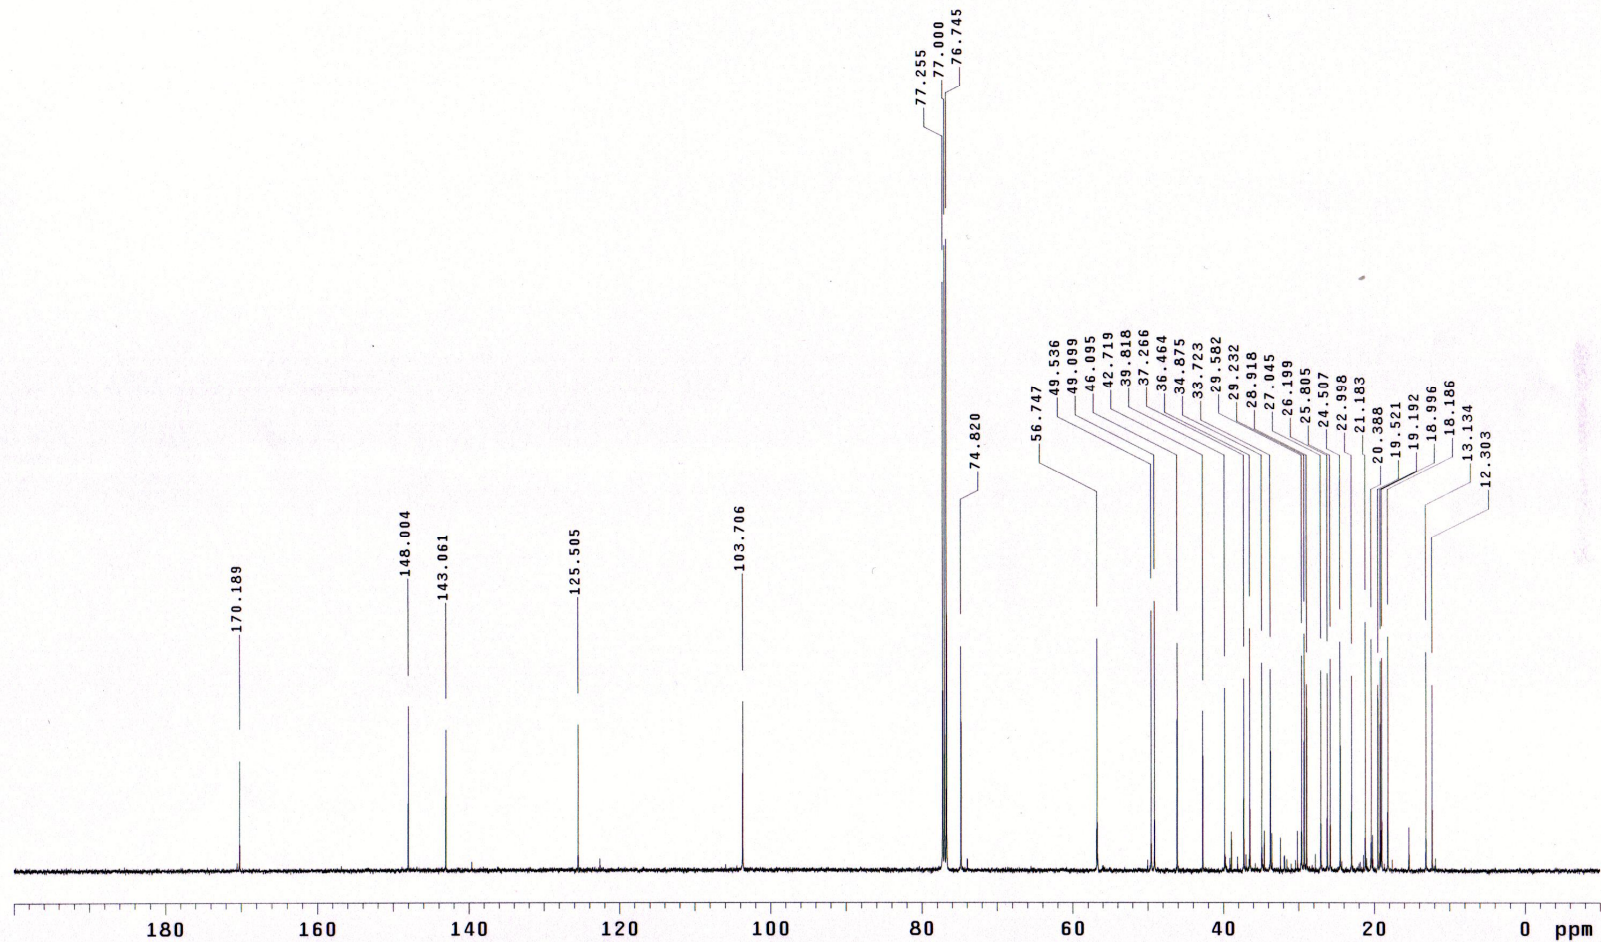

S5.  $^{13}\text{C}$  NMR spectrum of **2** in  $\text{CDCl}_3$  at 125 MHz.



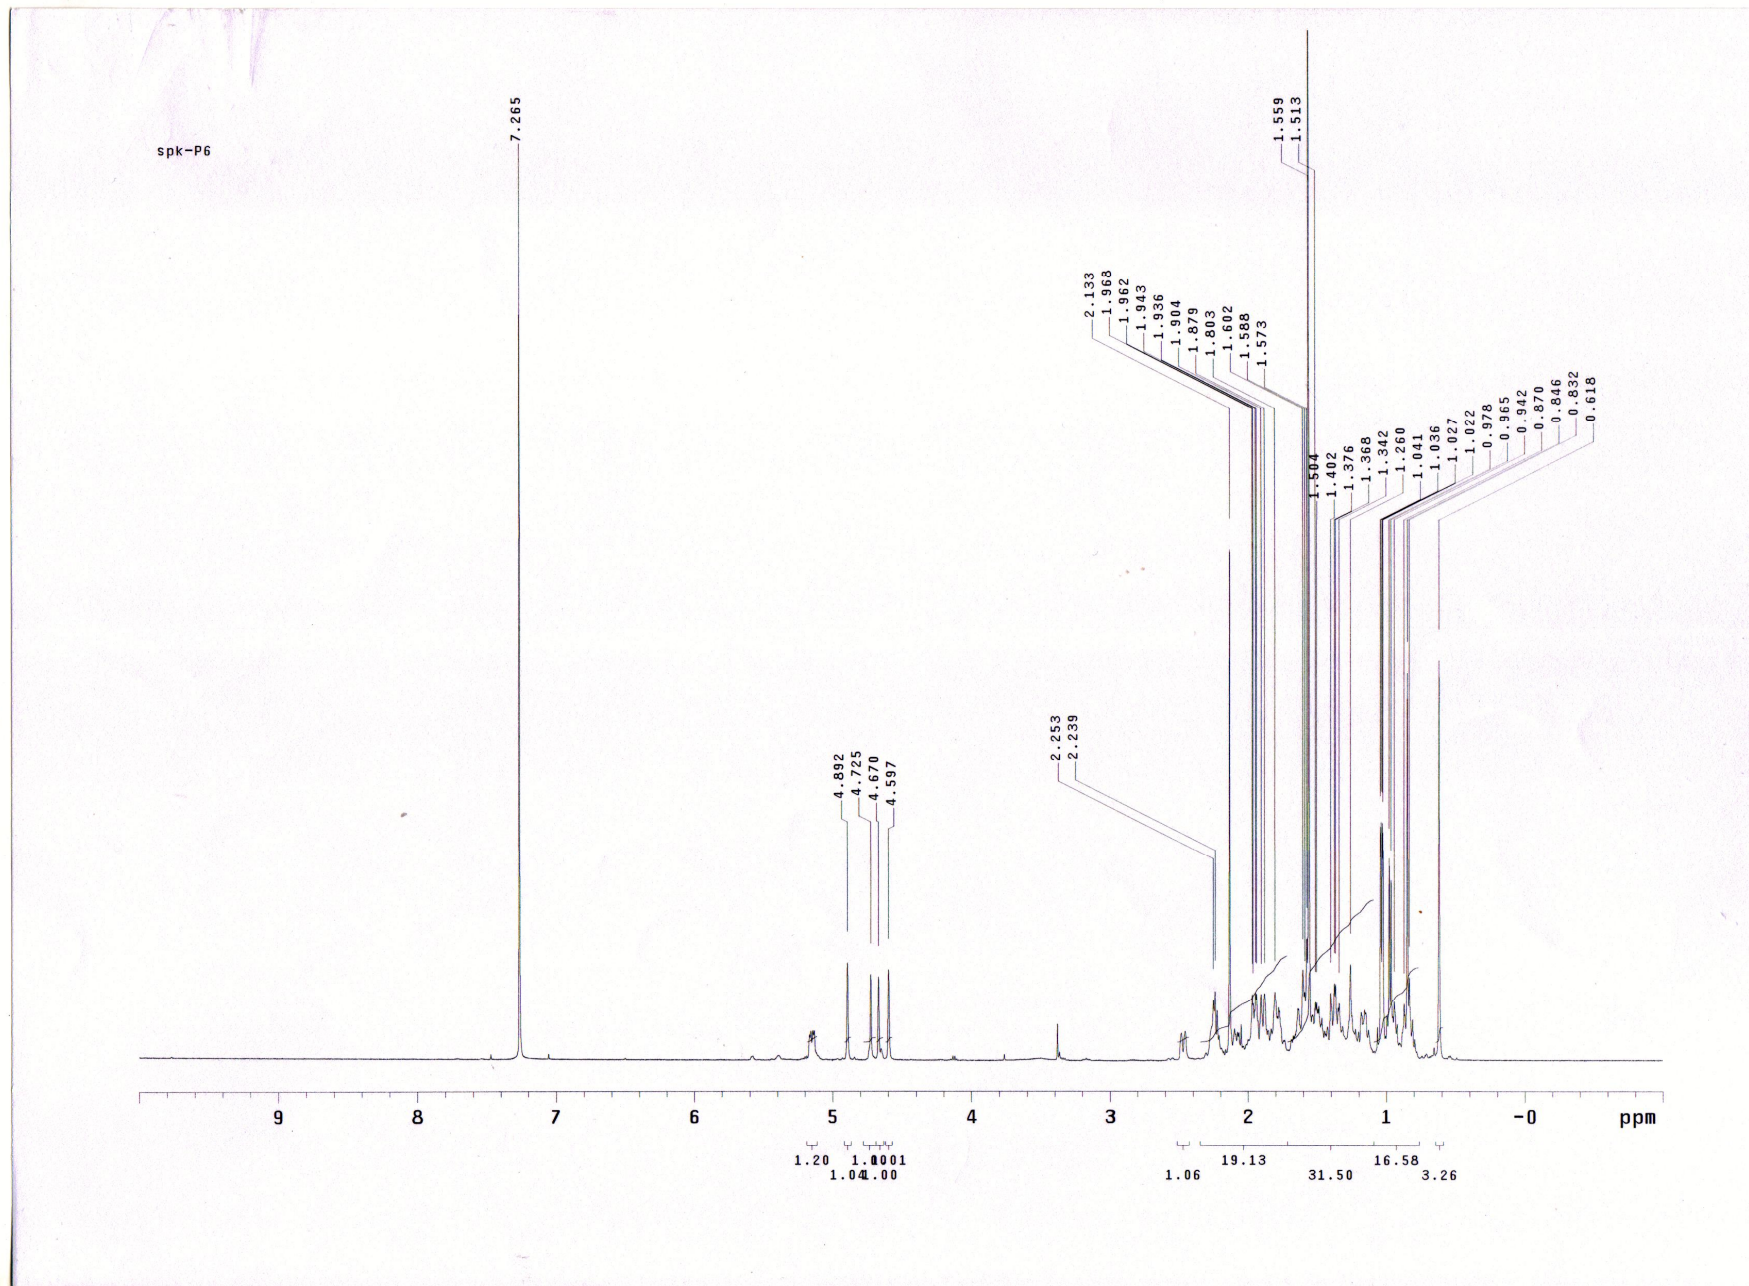

S6.  $^1\text{H}$  NMR spectrum of **3** in  $\text{CDCl}_3$  at 500 MHz.



spk-P6

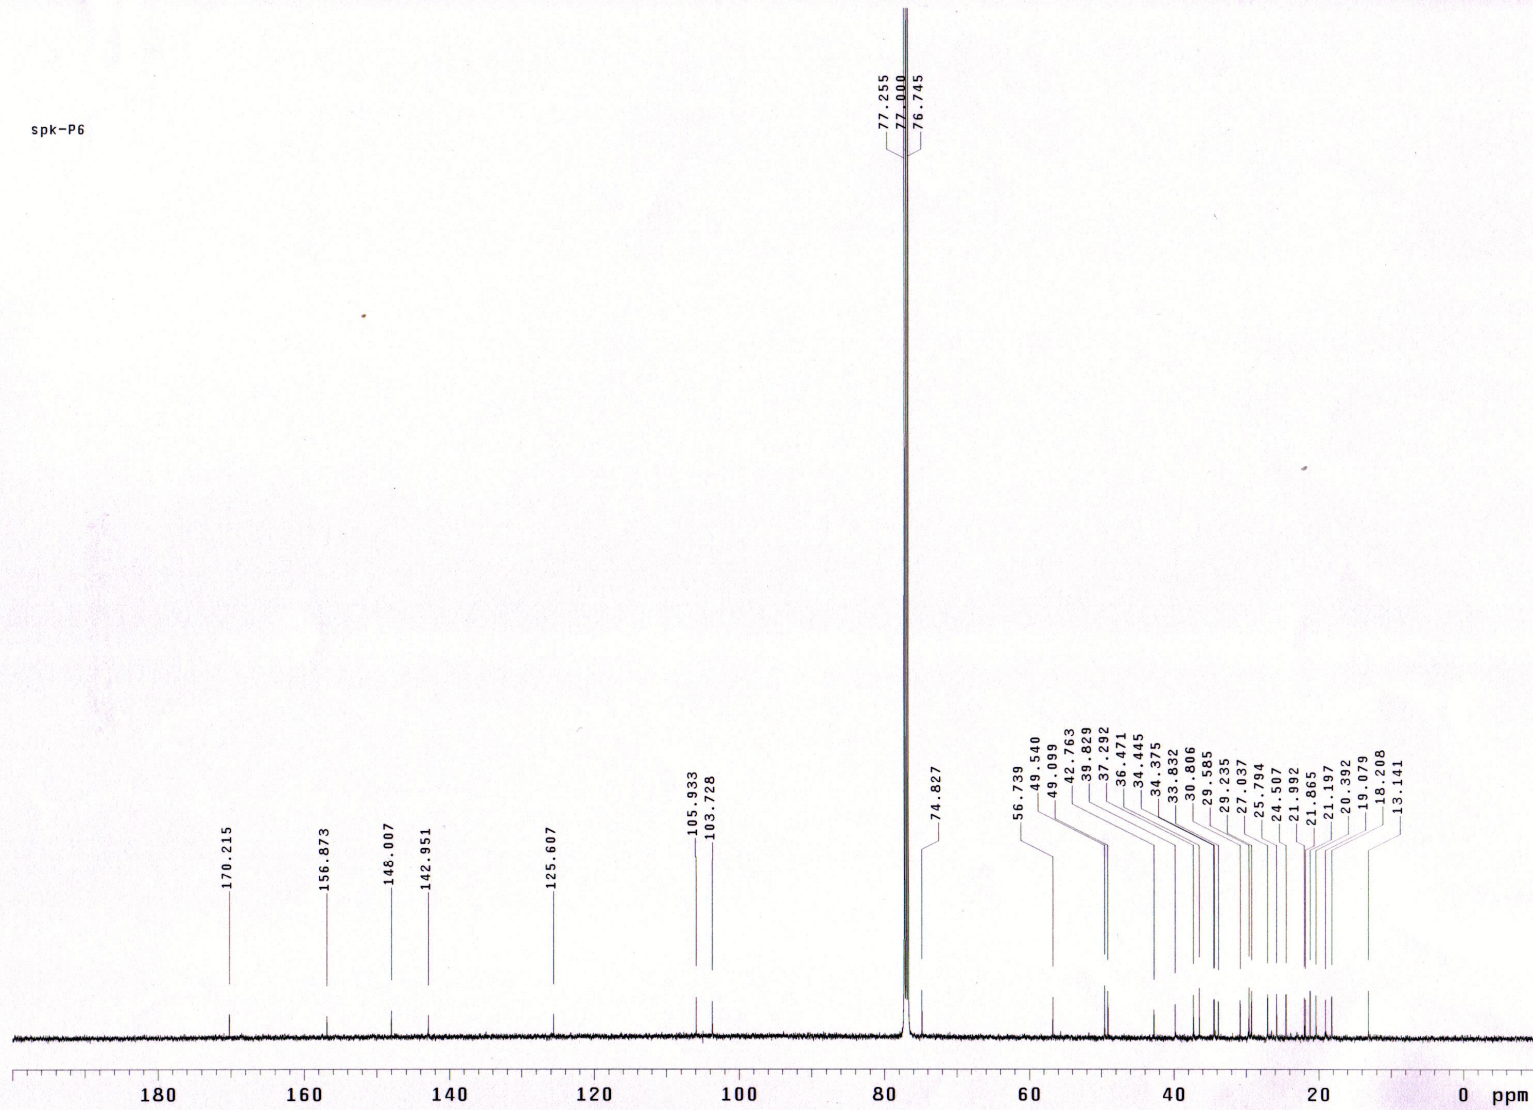

S7.  $^{13}\text{C}$  NMR spectrum of **3** in  $\text{CDCl}_3$  at 125 MHz.

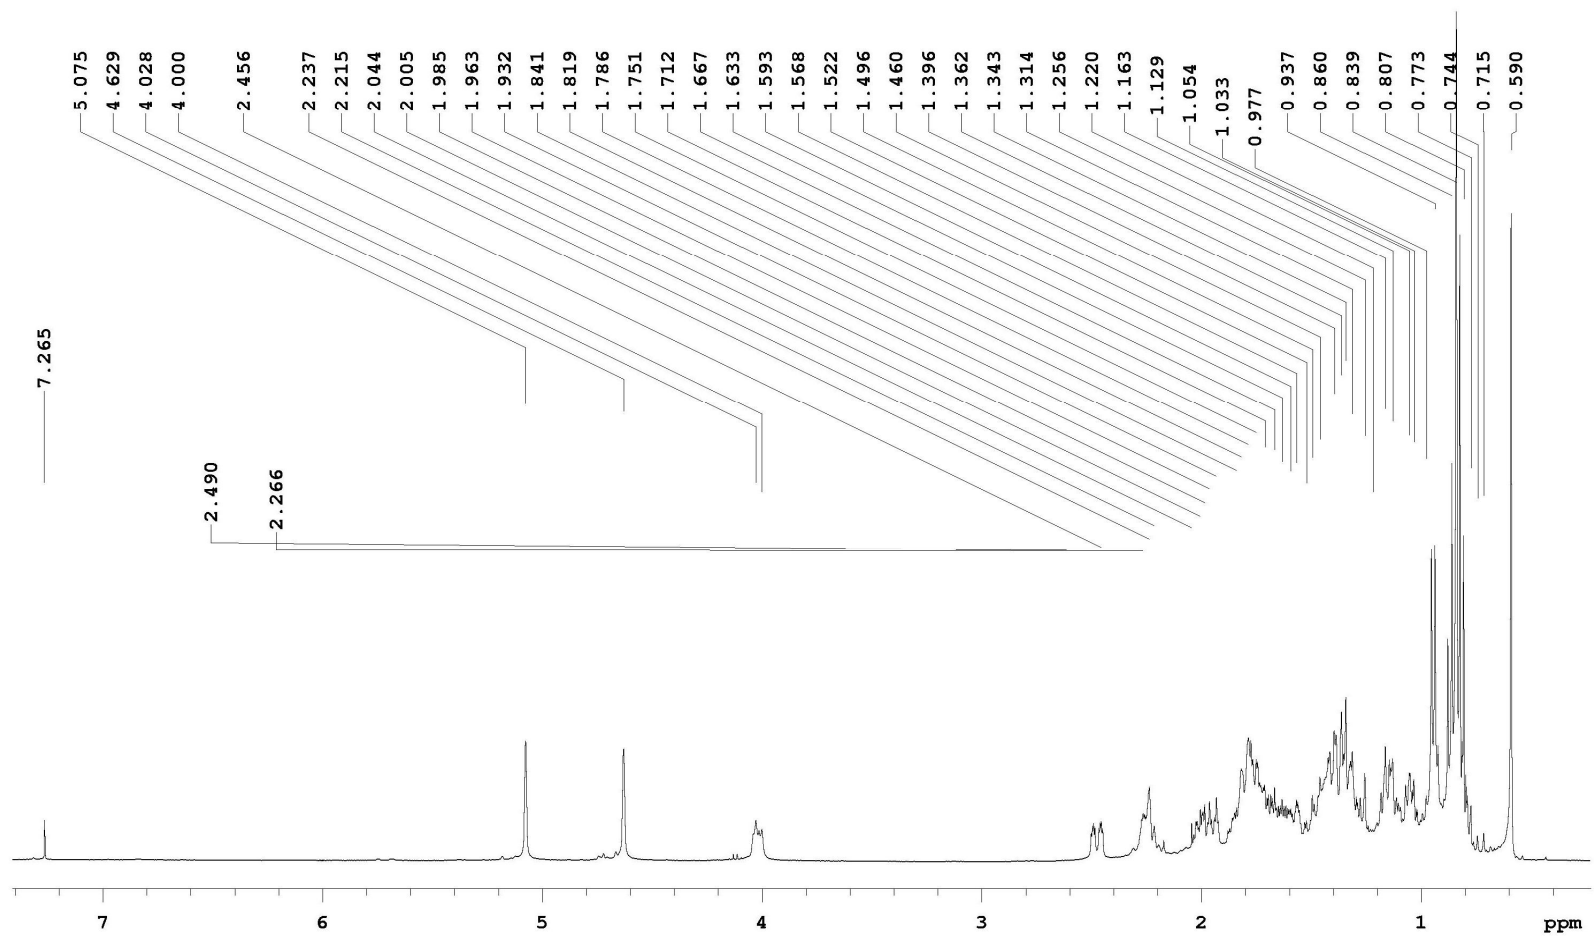

S8.  $^1\text{H}$  NMR spectrum of **4** in  $\text{CDCl}_3$  at 400 MHz.



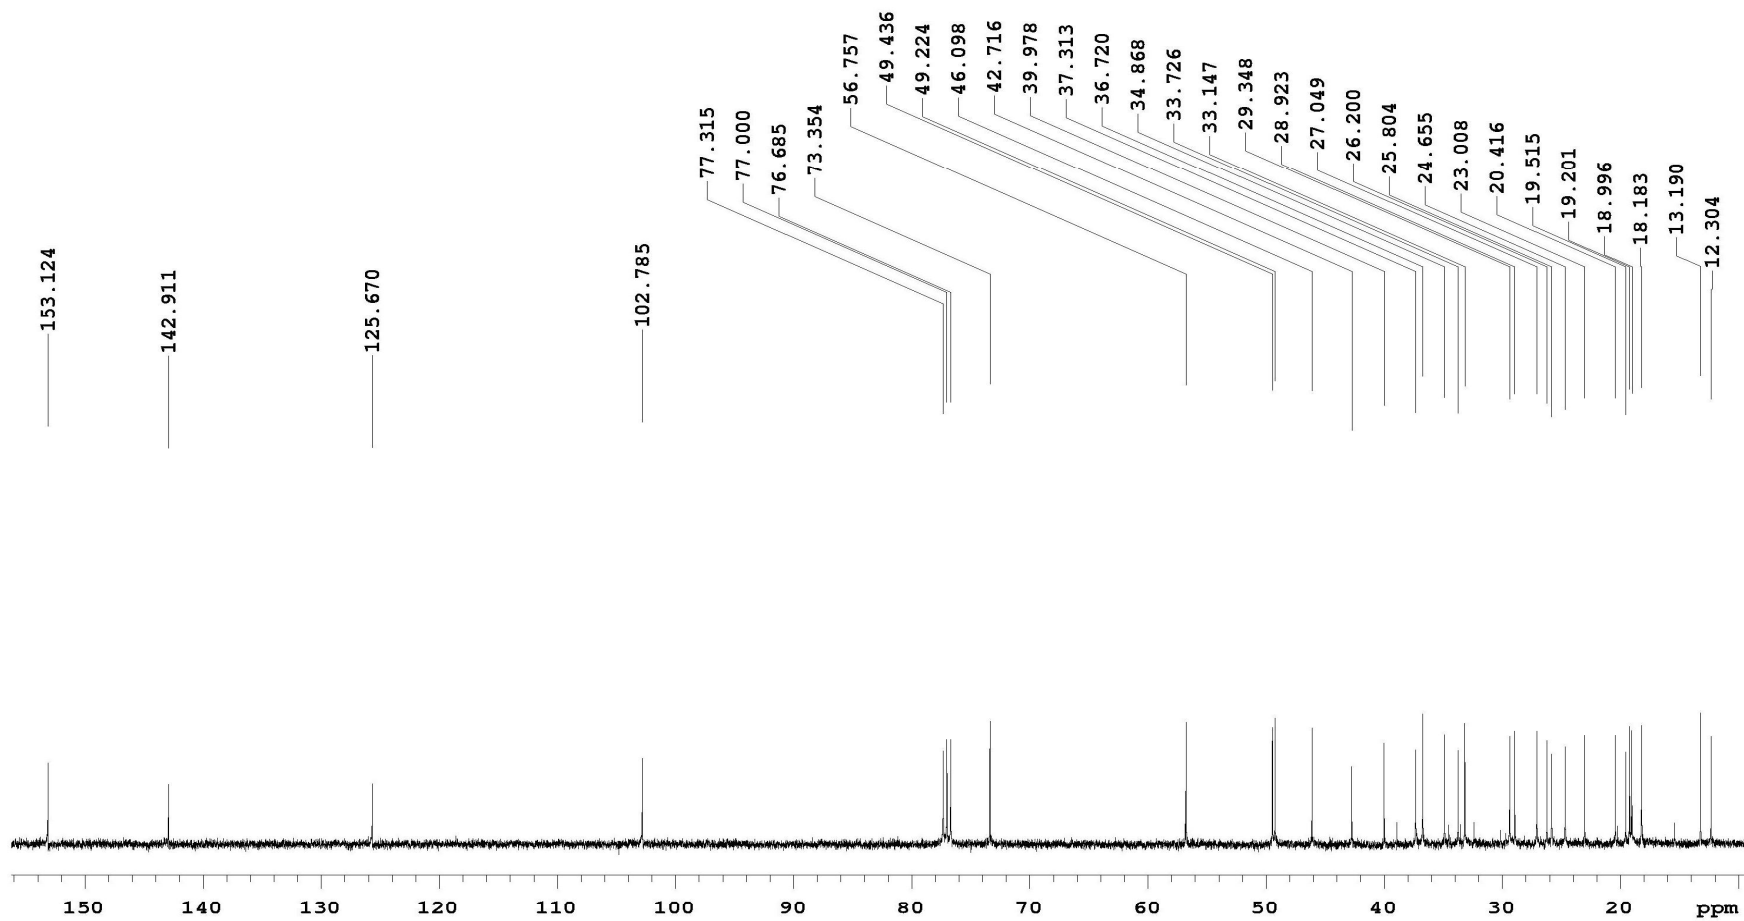

S9.  $^{13}\text{C}$  NMR spectrum of **4** in  $\text{CDCl}_3$  at 100 MHz.

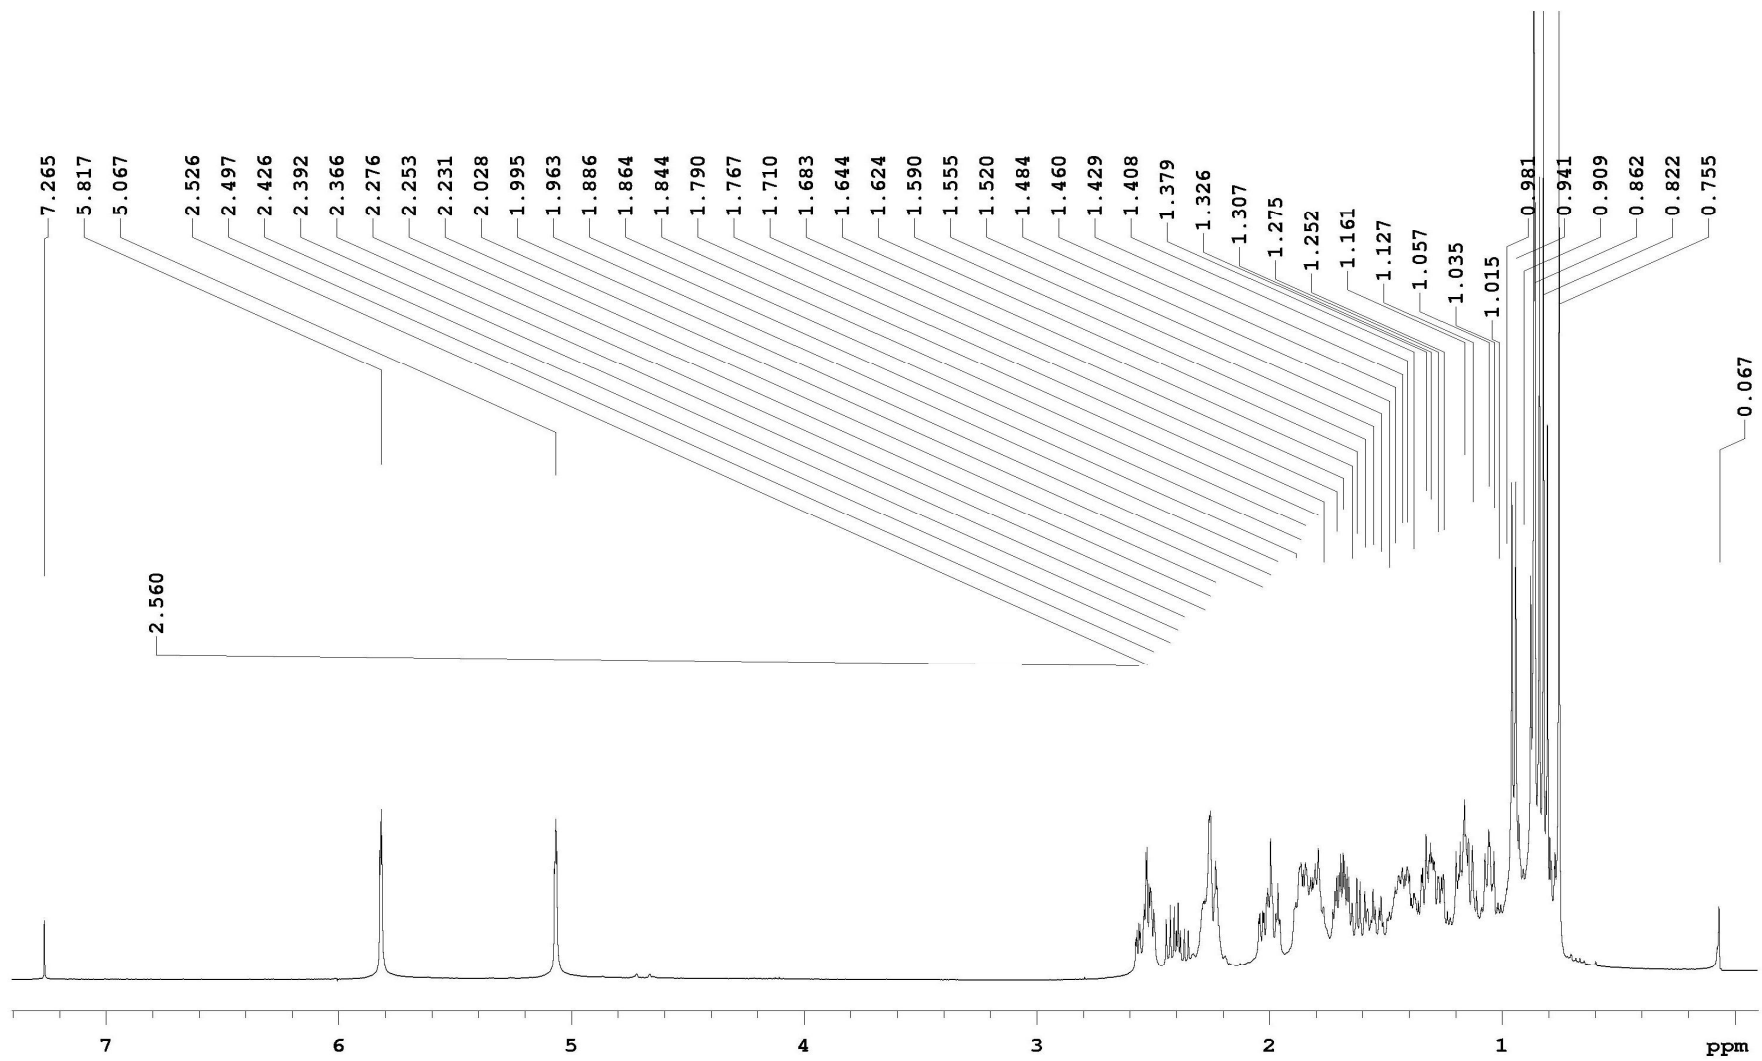

**S10.** <sup>1</sup>H NMR spectrum of **5** in CDCl<sub>3</sub> at 400 MHz.

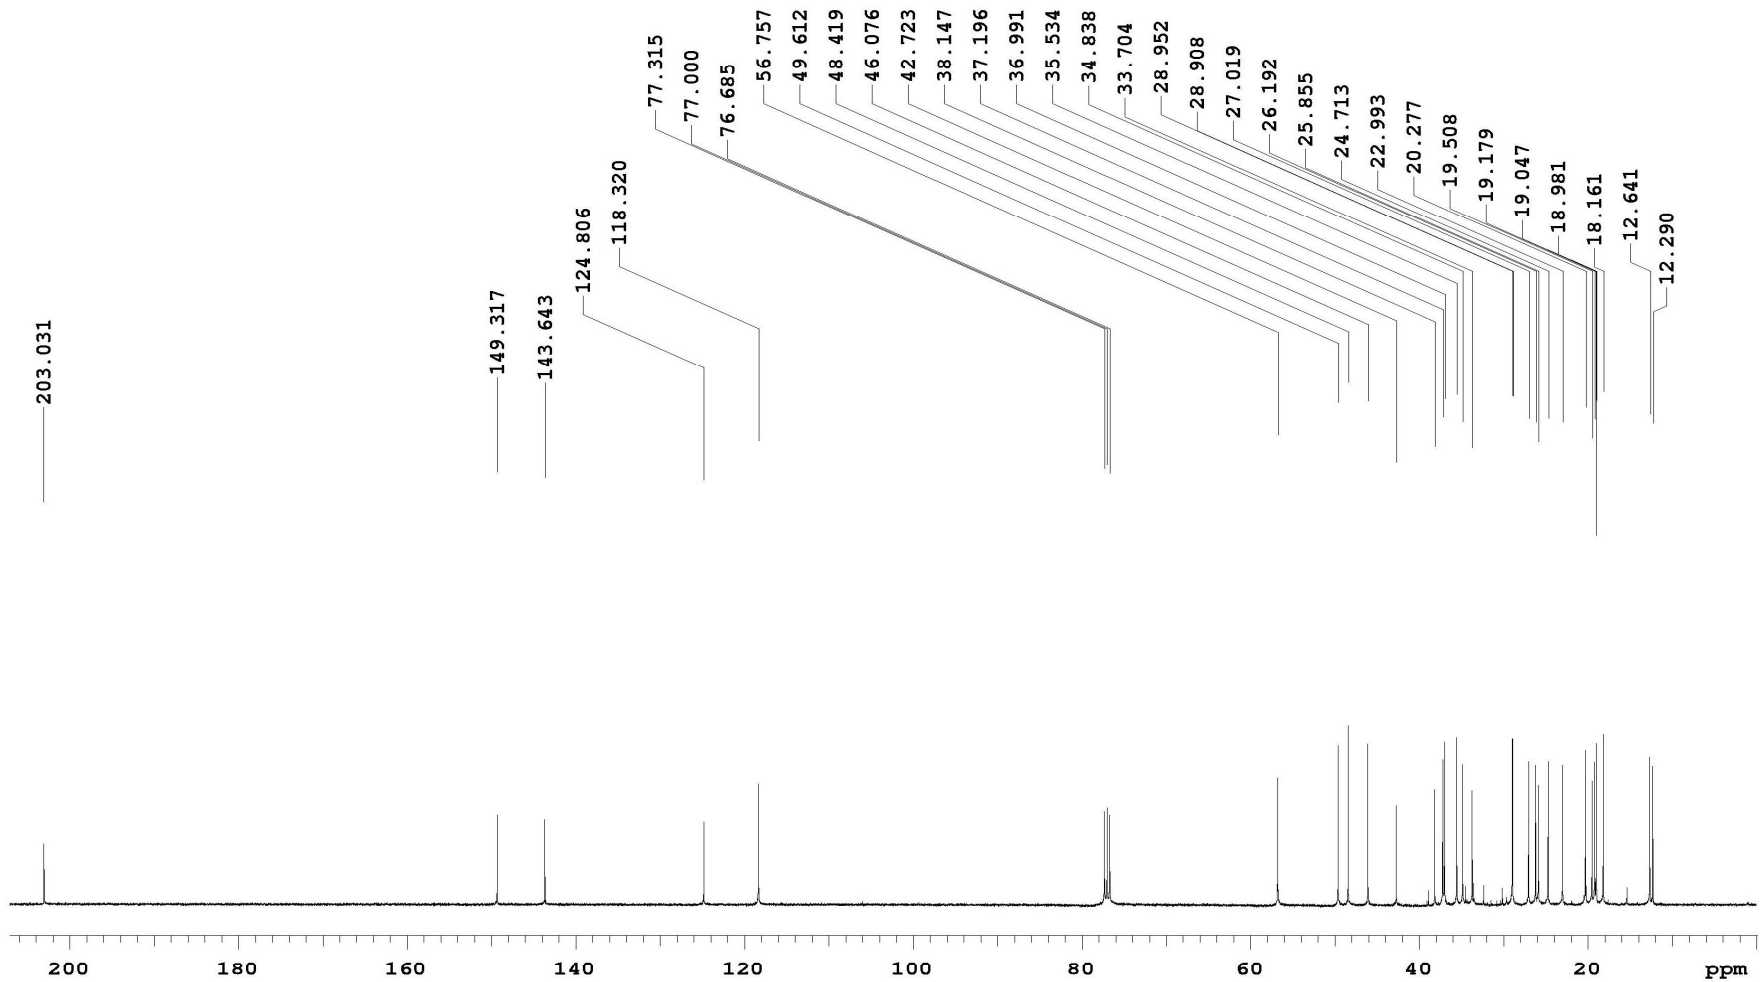

**S11.** <sup>13</sup>C NMR spectrum of **5** in CDCl<sub>3</sub> at 100 MHz.
